# Supplementary material for: Semi-Site-Specific Primer PCR: A Simple but Reliable Genome-Walking Tool
Source: MDPI journal article supplement (doi:10.3390/cimb45010034), 2023-01-05
Supplement: s1 [file s1]

| Sequence Name |
|---------------|
| Consensus     |
| 4 Sequences   |
| Ref. seq      |
| AS1. seq      |
| AS2. seq      |
| AS3. seq      |

## Known Region

## Unknown Region

10 20 30 40 50 60 70 80 90 100 110 120 130  
 ACTGACCGATGCTTTAAGAAATTCGGGATCTTTGACATTTTAACTGACGCGGTTCACAATACCAATCAATGCTGGAAATTAGCTGATGACGCTAAATGTTAAGTGGAACGTTGT  
 140 150 160 170 180 190 200 210 220 230 240  
 ACGGTGACATCAATTCGCAATTAATCTCTCCACAGTGGGGCGCATATTAGTGACAAATCAACAACATTTATCCGGTTCGTGAAGATGGGTGACAAAGGCTATTATGCAAAATGTTCCGAAGGTTTCTCGAA

|                                                                                                                                                                                                   |     |     |     |     |     |     |     |     |     |     |     |     |     |     |     |     |     |     |      |
|---------------------------------------------------------------------------------------------------------------------------------------------------------------------------------------------------|-----|-----|-----|-----|-----|-----|-----|-----|-----|-----|-----|-----|-----|-----|-----|-----|-----|-----|------|
| ATGATTGGGAATCTGAATTAGCTAACTACCGTTGGCAAGTACCTGCCTACCCACTACCAAAGAACCGTGACGATGTTACCATCAGTCGGATCGTTGTACGGCCTTCAATGACCATGACGATTGCGGATGATTCTTGGATGACTTGAAGTTAGCTATTGATGGGTTGAATCACAGTTTTGGTACAGAAGATGCC | 250 | 260 | 270 | 280 | 290 | 300 | 310 | 320 | 330 | 340 | 350 | 360 | 370 | 380 | 390 | 400 | 410 | 420 | 430  |
| ATGATTGGGAATCTGAATTAGCTAACTACCGTTGGCAAGTACCTGCCTACCCACTACCAAAGAACCGTGACGATGTTACCATCAGTCGGATCGTTGTACGGCCTTCAATGACCATGACGATTGCGGATGATTCTTGGATGACTTGAAGTTAGCTATTGATGGGTTGAATCACAGTTTTGGTACAGAAGATGCC | 440 | 450 | 460 | 470 | 480 | 490 | 500 | 510 | 520 | 530 | 540 | 550 | 560 | 570 | 580 | 590 | 600 | 610 | 620  |
| ATGATTGGGAATCTGAATTAGCTAACTACCGTTGGCAAGTACCTGCCTACCCACTACCAAAGAACCGTGACGATGTTACCATCAGTCGGATCGTTGTACGGCCTTCAATGACCATGACGATTGCGGATGATTCTTGGATGACTTGAAGTTAGCTATTGATGGGTTGAATCACAGTTTTGGTACAGAAGATGCC | 630 | 640 | 650 | 660 | 670 | 680 | 690 | 700 | 710 | 720 | 730 | 740 | 750 | 760 | 770 | 780 | 790 | 800 | 810  |
| ATGATTGGGAATCTGAATTAGCTAACTACCGTTGGCAAGTACCTGCCTACCCACTACCAAAGAACCGTGACGATGTTACCATCAGTCGGATCGTTGTACGGCCTTCAATGACCATGACGATTGCGGATGATTCTTGGATGACTTGAAGTTAGCTATTGATGGGTTGAATCACAGTTTTGGTACAGAAGATGCC | 820 | 830 | 840 | 850 | 860 | 870 | 880 | 890 | 900 | 910 | 920 | 930 | 940 | 950 | 960 | 970 | 980 | 990 | 1000 |

GCTAATGCGGATACTGATAACAAGACGACAGTTTCAACAATAAGTTTAACTAAGCCAGCACTTGAATAATAGTTAGTAATAATGTAAGAGCATAGAGGAGGAATTAGTGTGAGTGAAAAATTCAGGATTGAGAAAGAACGTACGGGTGAGATATGCCCCAGTCCAACTGGTTTCTCGCATATCGGTAACGCCCAAT  
 440 450 460 470 480 490 500 510 520 530 540 550 560 570 580 590 600 610 620 630  
 GCTAATGCGGATACTGATAACAAGACGACAGTTTCAACAATAAGTTTAACTAAGCCAGCACTTGAATAATAGTTAGTAATAATGTAAGAGCATAGAGGAGGAATTAGTGTGAGTGAAAAATTCAGGATTGAGAAAGAACGTACGGGTGAGATATGCCCCAGTCCAACTGGTTTCTCGCATATCGGTAACGCCCAAT  
 GCTAATGCGGATACTGATAACAAGACGACAGTTTCAACAATAAGTTTAACTAAGCCAGCACTTGAATAATAGTTAGTAATAATGTAAGAGCATAGAGGAGGAATTAGTGTGAGTGAAAAATTCAGGATTGAGAAAGAACGTACGGGTGAGATATGCCCCAGTCCAACTGGTTTCTCGCATATCGGTAACGCCCAAT  
 GCTAATGCGGATACTGATAACAAGACGACAGTTTCAACAATAAGTTTAACTAAGCCAGCACTTGAATAATAGTTAGTAATAATGTAAGAGCATAGAGGAGGAATTAGTGTGAGTGAAAAATTCAGGATTGAGAAAGAACGTACGGGTGAGATATGCCCCAGTCCAACTGGTTTCTCGCATATCGGTAACGCCCAAT  
 GCTAATGCGGATACTGATAACAAGACGACAGTTTCAACAATAAGTTTAACTAAGCCAGCACTTGAATAATAGTTAGTAATAATGTAAGAGCATAGAGGAGGAATTAGTGTGAGTGAAAAATTCAGGATTGAGAAAGAACGTACGGGTGAGATATGCCCCAGTCCAACTGGTTTCTCGCATATCGGTAACGCCCAAT

CCGCGCTGTTTAACTATTGTTTGGCGGCTCACTACAACGGAACGATGGTGCTACGGATTGAAGATACGTATGTTTAAAGCGGAATGTACACATGGTGAAGATAGCCAAATTGAAAACTTGCATTGGCTAGGGATCGACTGGGATGAAGGGCCAGATAAGCCCTAATCCTAAGTATGCGCCTTATCACCAAAACCGAGA  
640 650 660 670 680 690 700 710 720 730 740 750 760 770 780 790 800 810 820

CCGCGCTGTTTAACTATTGTTTGGCGGCTCACTACAAAGGAACGATGGTGCTACGGATTGAAGATACGTATGTTTAAAGCGGAATGTACACATGGTGAAGATAGCCAAATTGAAAACTTGCATTGGCTAGGGATCGACTGGGATGAAGGGCCAGATAAGCCCTAATCCTAAGTATGCGCCTTATCACCAAAACCGAGA  
CCGCGCTGTTTAACTATTGTTTGGCGGCTCACTACAAAGGAACGATGGTGCTACGGATTGAAGATACGTATGTTTAAAGCGGAATGTACACATGGTGAAGATAGCCAAATTGAAAACTTGCATTGGCTAGGGATCGACTGGGATGAAGGGCCAGATAAGCCCTAATCCTAAGTATGCGCCTTATCACCAAAACCGAGA  
CCGCGCTGTTTAACTATTGTTTGGCGGCTCACTACAAAGGAACGATGGTGCTACGGATTGAAGATACGTATGTTTAAAGCGGAATGTACACATGGTGAAGATAGCCAAATTGAAAACTTGCATTGGCTAGGGATCGACTGGGATGAAGGGCCAGATAAGCCCTAATCCTAAGTATGCGCCTTATCACCAAAACCGAGA  
CCGCGCTGTTTAACTATTGTTTGGCGGCTCACTACAAAGGAACGATGGTGCTACGGATTGAAGATACGTATGTTTAAAGCGGAATGTACACATGGTGAAGATAGCCAAATTGAAAACTTGCATTGGCTAGGGATCGACTGGGATGAAGGGCCAGATAAGCCCTAATCCTAAGTATGCGCCTTATCACCAAAACCGAGA

|                                                                                                                                                                                                         |     |     |     |     |     |     |     |     |     |     |     |     |     |     |     |     |      |      |      |  |  |  |  |  |  |  |  |  |  |  |  |  |  |  |  |  |  |  |  |  |  |  |  |  |  |  |  |  |  |  |  |  |  |  |  |  |  |  |  |  |  |  |  |  |  |  |  |  |  |  |  |  |  |  |  |  |  |  |  |  |  |  |  |  |  |  |  |  |  |  |  |  |  |  |  |  |  |  |  |
|---------------------------------------------------------------------------------------------------------------------------------------------------------------------------------------------------------|-----|-----|-----|-----|-----|-----|-----|-----|-----|-----|-----|-----|-----|-----|-----|-----|------|------|------|--|--|--|--|--|--|--|--|--|--|--|--|--|--|--|--|--|--|--|--|--|--|--|--|--|--|--|--|--|--|--|--|--|--|--|--|--|--|--|--|--|--|--|--|--|--|--|--|--|--|--|--|--|--|--|--|--|--|--|--|--|--|--|--|--|--|--|--|--|--|--|--|--|--|--|--|--|--|--|--|
| GAAAAGACCTCTATCACCGTTACATTAAA--CAGCTATTGGATCAGGGACTGGCTTACAAGGATACGCAACCGAAGAAGAATTAAACGGAAATCGGGGACGCAACACGCGCCAAAGCGAAGCACCGCATTTATGATGGCCGTTGGTATGGCAAGAGTGAAGCGGAACAACAAAGCTGCAGAAAGCACAAAGGACTGAAG |     |     |     |     |     |     |     |     |     |     |     |     |     |     |     |     |      |      |      |  |  |  |  |  |  |  |  |  |  |  |  |  |  |  |  |  |  |  |  |  |  |  |  |  |  |  |  |  |  |  |  |  |  |  |  |  |  |  |  |  |  |  |  |  |  |  |  |  |  |  |  |  |  |  |  |  |  |  |  |  |  |  |  |  |  |  |  |  |  |  |  |  |  |  |  |  |  |  |  |
| 830                                                                                                                                                                                                     | 840 | 850 | 860 | 870 | 880 | 890 | 900 | 910 | 920 | 930 | 940 | 950 | 960 | 970 | 980 | 990 | 1000 | 1010 | 1020 |  |  |  |  |  |  |  |  |  |  |  |  |  |  |  |  |  |  |  |  |  |  |  |  |  |  |  |  |  |  |  |  |  |  |  |  |  |  |  |  |  |  |  |  |  |  |  |  |  |  |  |  |  |  |  |  |  |  |  |  |  |  |  |  |  |  |  |  |  |  |  |  |  |  |  |  |  |  |  |  |
| GAAAAGACCTCTATCACCGTTACATTAAA--CAGCTATTGGATCAGGGACTGGCTTACAAGGATACGCAACCGAAGAAGAATTAAACGGAAATCGGGGACGCAACACGCGCCAAAGCGAAGCACCGCATTTATGATGGCCGTTGGTATGGCAAGAGTGAAGCGGAACAACAAAGCTGCAGAAAGCACAAAGGACTGAAG |     |     |     |     |     |     |     |     |     |     |     |     |     |     |     |     |      |      |      |  |  |  |  |  |  |  |  |  |  |  |  |  |  |  |  |  |  |  |  |  |  |  |  |  |  |  |  |  |  |  |  |  |  |  |  |  |  |  |  |  |  |  |  |  |  |  |  |  |  |  |  |  |  |  |  |  |  |  |  |  |  |  |  |  |  |  |  |  |  |  |  |  |  |  |  |  |  |  |  |
| GAAAAGACCTCTATCACCGTTACATTAAA--CAGCTATTGGATCAGGGACTGGCTTACAAGGATACGCAACCGAAGAAGAATTAAACGGAAATCGGGGACGCAACACGCGCCAAAGCGAAGCACCGCATTTATGATGGCCGTTGGTATGGCAAGAGTGAAGCGGAACAACAAAGCTGCAGAAAGCACAAAGGACTGAAG |     |     |     |     |     |     |     |     |     |     |     |     |     |     |     |     |      |      |      |  |  |  |  |  |  |  |  |  |  |  |  |  |  |  |  |  |  |  |  |  |  |  |  |  |  |  |  |  |  |  |  |  |  |  |  |  |  |  |  |  |  |  |  |  |  |  |  |  |  |  |  |  |  |  |  |  |  |  |  |  |  |  |  |  |  |  |  |  |  |  |  |  |  |  |  |  |  |  |  |
| GAAAAGACCTCTATCACCGTTACATTAAAACAGCTATTGGATCAGGGACTGGCTTACAAGGATACGCAACCGAAGAAGAATTAAACGGAAATCGGGGACGCAACACGCGCCAAAGCGAAGCACCGCATTTATGATGGCCGTTGGTATGGCAAGAGTGAAGCGGAACAACAAAGCTGCAGAAAGCACAAAGGACTGAAG  |     |     |     |     |     |     |     |     |     |     |     |     |     |     |     |     |      |      |      |  |  |  |  |  |  |  |  |  |  |  |  |  |  |  |  |  |  |  |  |  |  |  |  |  |  |  |  |  |  |  |  |  |  |  |  |  |  |  |  |  |  |  |  |  |  |  |  |  |  |  |  |  |  |  |  |  |  |  |  |  |  |  |  |  |  |  |  |  |  |  |  |  |  |  |  |  |  |  |  |

[illegible]

semi-oSSP II site

[illegible]

|                                                                                                                                                                                                      |      |      |      |      |      |      |      |      |      |      |      |      |      |      |      |      |      |      |
|------------------------------------------------------------------------------------------------------------------------------------------------------------------------------------------------------|------|------|------|------|------|------|------|------|------|------|------|------|------|------|------|------|------|------|
| AAGCTATGAAGTGTACTTGCATTGCAAGCTTCCTTGGAAATTCCTCAATTGGAGACACGTATGTCTACGCTAGATCGTTTCCCAAGGACGAATTGCCCAATGATCATCAACGGCAAAAACCTCTTGGCTAAATTCAAAAATAATGTCTATGCATTTCGAGAAACAGGGCAATTGTCTGACGATTTAATTTCGTATA |      |      |      |      |      |      |      |      |      |      |      |      |      |      |      |      |      |      |
| 2400                                                                                                                                                                                                 | 2410 | 2420 | 2430 | 2440 | 2450 | 2460 | 2470 | 2480 | 2490 | 2500 | 2510 | 2520 | 2530 | 2540 | 2550 | 2560 | 2570 | 2580 |
| AAGCTATGAAGTGTACTTGCATTGCAAGCTTCCTTGGAAATTCCTCAATTGGAGACACGTATGTCTACGCTAGATCGTTTCCCAAGGACGAATTGCCCAATGATCATCAACGGCAAAAACCTCTTGGCTAAATTCAAAAATAATGTCTATGCATTTCGAGAAACAGGGCAATTGTCTGACGATTTAATTTCGTATA |      |      |      |      |      |      |      |      |      |      |      |      |      |      |      |      |      |      |
| AAGCTATGAAGTGTACTTGCATTGCAAGCTTCCTTGGAAATTCCTCAATTGGAGACACGTATGTCTACGCTAGATCGTTTCCCAAGGACGAATTGCCCAATGATCATCAACGGCAAAAACCTCTTGGCTAAATTCAAAAATAATGTCTATGCATTTCGAGAAACAGGGCAATTGTCTGACGATTTAATTTCGTATA |      |      |      |      |      |      |      |      |      |      |      |      |      |      |      |      |      |      |
| AAGCTATGAAGTGTACTTGCATTGCAAGCTTCCTTGGAAATTCCTCAATTGGAGACACGTATGTCTACGCTAGATCGTTTCCCAAGGACGAATTGCCCAATGATCATCAACGGCAAAAACCTCTTGGCTAAATTCAAAAATAATGTCTATGCATTTCGAGAAACAGGGCAATTGTCTGACGATTTAATTTCGTATA |      |      |      |      |      |      |      |      |      |      |      |      |      |      |      |      |      |      |

[illegible][illegible]

---

semi-oSSP III site





gadR

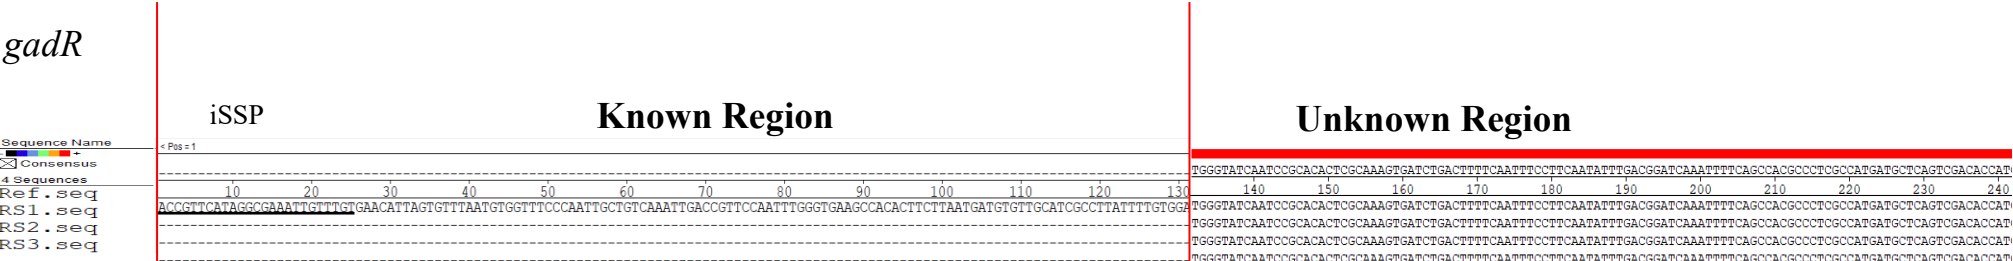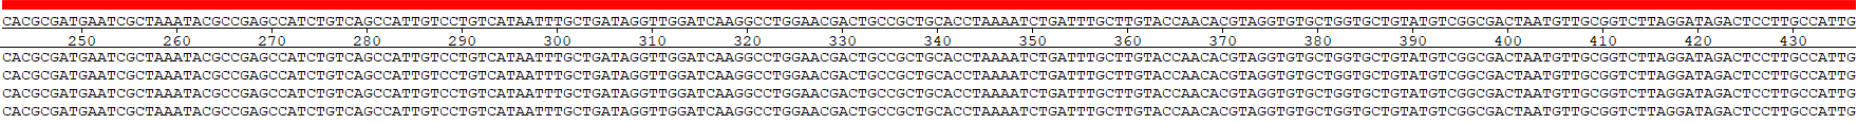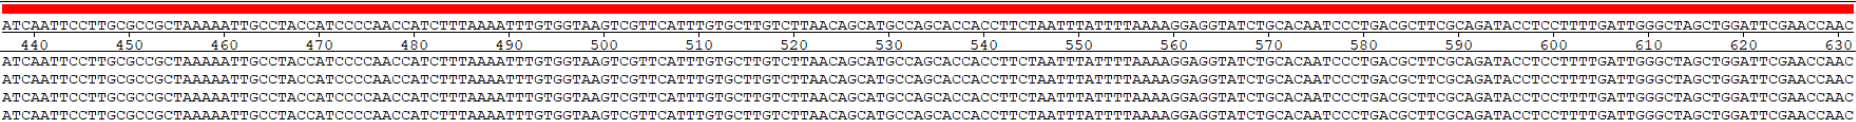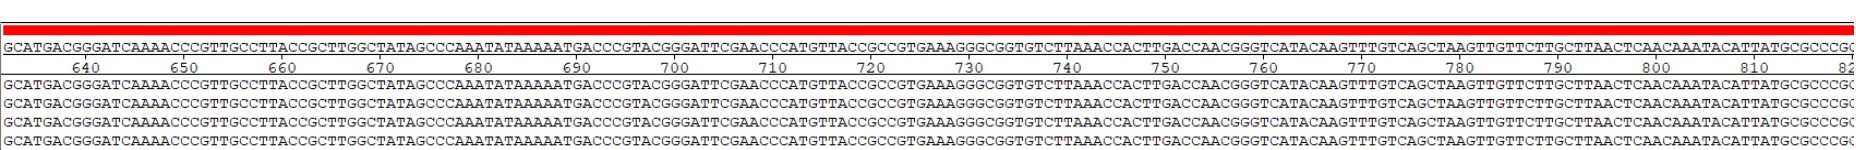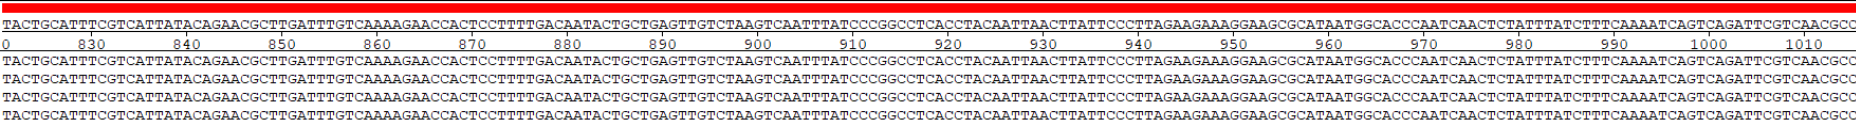



GTTTT--GCTGATAACTATTACAGCTTTACGACAGGAAATCATGACACTTACTGGAAAAAGTGTCGGTCGGGGTACGCTCATTCTGTTGGGAAAGAGGGGCAGTCCATTCCCCGACTCCCTCTCCCTATTCGCTATTGAGAAATTAGGGGGCGCATAGCTTGGACAACATGCTGAAACCTAGTTACGACCTCTCAACCAC  
 1020 1030 1040 1050 1060 1070 1080 1090 1100 1110 1120 1130 1140 1150 1160 1170 1180 1190 1200 1210  
 GTTTT--GCTGATAACTATTACAGCTTTACGACAGGAAATCATGACACTTACTGGAAAAAGTGTCGGTCGGGGTACGCTCATTCTGTTGGGAAAGAGGGGCAGTCCATTCCCCGACTCCCTCTCCCTATTCGCTATTGAGAAATTAGGGGGCGCATAGCTTGGACAACATGCTGAAACCTAGTTACGACCTCTCAACCAC  
 GTTTTACGACAGCGGAGTATCGCAGCT  
 GTTTT--GCTGATAACTATTACAGCTTTACGACAGGAAATCATGACACTTACTGGAAAAAGTGTCGGTCGGGGTACGCTCATTCTGTTGGGAAAGAGGGGCAGTCCATTCCCCGACTCCCTCTCCCTATTCGCTATTGAGAAATTAGGGGGCGCATAGCTTGGACAACATGCTGAAACCTAGTTACGACCTCTCAACCAC  
 GTTTT--GCTGATAACTATTACAGCTTTACGACAGGAAATCATGACACTTACTGGAAAAAGTGTCGGTCGGGGTACGCTCATTCTGTTGGGAAAGAGGGGCAGTCCATTCCCCGACTCCCTCTCCCTATTCGCTATTGAGAAATTAGGGGGCGCATAGCTTGGACAACATGCTGAAACCTAGTTACGACCTCTCAACCAC  
 semi-oSSP i site

[illegible]

|                                                                                                                                                                                              |      |      |      |      |      |      |      |      |      |      |      |      |      |      |      |      |      |      |      |  |  |  |  |  |  |  |  |  |  |  |  |  |  |  |  |  |  |  |  |  |  |  |  |  |  |  |  |  |  |  |  |  |  |  |  |  |  |  |  |  |  |  |  |  |  |  |  |  |  |  |  |  |  |  |  |  |  |  |  |  |  |  |  |  |  |  |  |  |  |  |  |  |  |  |  |  |  |  |  |  |  |  |  |  |  |  |  |  |  |  |  |  |  |  |  |  |  |  |  |  |  |  |  |  |  |  |  |  |  |  |  |  |  |  |  |  |  |  |  |  |  |  |  |  |  |  |  |  |  |  |  |  |  |  |  |  |  |  |  |
|----------------------------------------------------------------------------------------------------------------------------------------------------------------------------------------------|------|------|------|------|------|------|------|------|------|------|------|------|------|------|------|------|------|------|------|--|--|--|--|--|--|--|--|--|--|--|--|--|--|--|--|--|--|--|--|--|--|--|--|--|--|--|--|--|--|--|--|--|--|--|--|--|--|--|--|--|--|--|--|--|--|--|--|--|--|--|--|--|--|--|--|--|--|--|--|--|--|--|--|--|--|--|--|--|--|--|--|--|--|--|--|--|--|--|--|--|--|--|--|--|--|--|--|--|--|--|--|--|--|--|--|--|--|--|--|--|--|--|--|--|--|--|--|--|--|--|--|--|--|--|--|--|--|--|--|--|--|--|--|--|--|--|--|--|--|--|--|--|--|--|--|--|--|--|--|
|                                                                                                                                                                                              |      |      |      |      |      |      |      |      |      |      |      |      |      |      |      |      |      |      |      |  |  |  |  |  |  |  |  |  |  |  |  |  |  |  |  |  |  |  |  |  |  |  |  |  |  |  |  |  |  |  |  |  |  |  |  |  |  |  |  |  |  |  |  |  |  |  |  |  |  |  |  |  |  |  |  |  |  |  |  |  |  |  |  |  |  |  |  |  |  |  |  |  |  |  |  |  |  |  |  |  |  |  |  |  |  |  |  |  |  |  |  |  |  |  |  |  |  |  |  |  |  |  |  |  |  |  |  |  |  |  |  |  |  |  |  |  |  |  |  |  |  |  |  |  |  |  |  |  |  |  |  |  |  |  |  |  |  |  |  |
| 1410                                                                                                                                                                                         | 1420 | 1430 | 1440 | 1450 | 1460 | 1470 | 1480 | 1490 | 1500 | 1510 | 1520 | 1530 | 1540 | 1550 | 1560 | 1570 | 1580 | 1590 | 1600 |  |  |  |  |  |  |  |  |  |  |  |  |  |  |  |  |  |  |  |  |  |  |  |  |  |  |  |  |  |  |  |  |  |  |  |  |  |  |  |  |  |  |  |  |  |  |  |  |  |  |  |  |  |  |  |  |  |  |  |  |  |  |  |  |  |  |  |  |  |  |  |  |  |  |  |  |  |  |  |  |  |  |  |  |  |  |  |  |  |  |  |  |  |  |  |  |  |  |  |  |  |  |  |  |  |  |  |  |  |  |  |  |  |  |  |  |  |  |  |  |  |  |  |  |  |  |  |  |  |  |  |  |  |  |  |  |  |  |  |  |
| CCCGCTTTACCTCTATCATTAGGCCCATGGCAGATATTCGTCGACGAATACTTGTTCAACCCTTATCCTTTGGACTAAATCGATGAGGCATCTTTAAGATTGGAGGTCTAAACTCTTGGAAAAATGCTCTAACAAATGCTGGTCTGATAAATTGGCTGGTGGAGGGATTACGAGCAGACTTAAAAATT |      |      |      |      |      |      |      |      |      |      |      |      |      |      |      |      |      |      |      |  |  |  |  |  |  |  |  |  |  |  |  |  |  |  |  |  |  |  |  |  |  |  |  |  |  |  |  |  |  |  |  |  |  |  |  |  |  |  |  |  |  |  |  |  |  |  |  |  |  |  |  |  |  |  |  |  |  |  |  |  |  |  |  |  |  |  |  |  |  |  |  |  |  |  |  |  |  |  |  |  |  |  |  |  |  |  |  |  |  |  |  |  |  |  |  |  |  |  |  |  |  |  |  |  |  |  |  |  |  |  |  |  |  |  |  |  |  |  |  |  |  |  |  |  |  |  |  |  |  |  |  |  |  |  |  |  |  |  |  |
| CCCGCTTTACCTCTATCATTAGGCCCATGGCAGATATTCGTCGACGAATACTTGTTCAACCCTTATCCTTTGGACTAAATCGATGAGGCATCTTTAAGATTGGAGGTCTAAACTCTTGGAAAAATGCTCTAACAAATGCTGGTCTGATAAATTGGCTGGTGGAGGGATTACGAGCAGACTTAAAAATT |      |      |      |      |      |      |      |      |      |      |      |      |      |      |      |      |      |      |      |  |  |  |  |  |  |  |  |  |  |  |  |  |  |  |  |  |  |  |  |  |  |  |  |  |  |  |  |  |  |  |  |  |  |  |  |  |  |  |  |  |  |  |  |  |  |  |  |  |  |  |  |  |  |  |  |  |  |  |  |  |  |  |  |  |  |  |  |  |  |  |  |  |  |  |  |  |  |  |  |  |  |  |  |  |  |  |  |  |  |  |  |  |  |  |  |  |  |  |  |  |  |  |  |  |  |  |  |  |  |  |  |  |  |  |  |  |  |  |  |  |  |  |  |  |  |  |  |  |  |  |  |  |  |  |  |  |  |  |  |

[illegible][illegible][illegible]

GTTCCTCCAGCAAAAAGCCACCCCAAGCCCAAGCCGCGGATCGTTTTACTGACGAAATATATCCCCGTGACCGTTGGTGACACGACCATCACTGCCGACGAGGCCGTGCGGACGACCACATCTCTGGACCAACTGGCTCATTTGAAACCAAGCCTTCAAGGCCGATGGTACGGTCAACAGCCGGCAATGCCCGGGTCTAA

|                                                                                             |      |      |      |      |      |      |
|---------------------------------------------------------------------------------------------|------|------|------|------|------|------|
| <div></div> <div>XXXXXXXXXXXXXXXXXXXXXXXXXXXXXXXXXXXXXXXXXXXXXXXXXXXXXXXXXXXXXXXXXXXX</div> |      |      |      |      |      |      |
| 4520                                                                                        | 4530 | 4540 | 4550 | 4560 | 4570 | 4580 |
| CGAGATCAACGAGGCCCTTTGCCGCTCAGTCCGTTGCCATTGCCCGCGACCTGGCCATCCCCGCCGACAAGCTC                  |      |      |      |      |      |      |
| CGAGATC--CGAGTTATGAAGCG--AGGTATTAC-ATG                                                      |      |      |      |      |      |      |

semi-oSSP III site

*hyg*

iSSP

## Known Region

## Unknown Region

| Sequence Name | Pos = 1                                                                                                                           |
|---------------|-----------------------------------------------------------------------------------------------------------------------------------|
| Consensus     | 10 20 30 40 50 60 70 80 90 100 110 120 130                                                                                        |
| Sequences     | 140 150 160 170 180 190 200 210 220 230                                                                                           |
| H1.seq        | CAAGGAATCGGTCAATCACTACATGGGTGATTTCATATGGGGAGTTGCTGATCCCATGTGTATCACTGGCAAACTGTGATGGAGGACACCGCTCACTGCGTCCGTCGGCGAGGCTCTCGATGAGCTGAT |
| H2.seq        | GCTTTGGGCGAGGACTGCCCGGAAGTCGGCGCACTCTGTCGACGCGGATTTCGGCTCCAAACATGTCTCGACGGACAATGGCGCGATACACAGCGGTCAATTGACT                        |
| H3.seq        | GCTTTGGGCGAGGACTGCCCGGAAGTCGGCGCACTCTGTCGACGCGGATTTCGGCTCCAAACATGTCTCGACGGACAATGGCGCGATACACAGCGGTCAATTGACT                        |
| H4.seq        | GCTTTGGGCGAGGACTGCCCGGAAGTCGGCGCACTCTGTCGACGCGGATTTCGGCTCCAAACATGTCTCGACGGACAATGGCGCGATACACAGCGGTCAATTGACT                        |
| H5.seq        | GCTTTGGGCGAGGACTGCCCGGAAGTCGGCGCACTCTGTCGACGCGGATTTCGGCTCCAAACATGTCTCGACGGACAATGGCGCGATACACAGCGGTCAATTGACT                        |

[illegible][illegible]

semi-oSSP II site

AGGGCAAGAAATAGAGTAGATGCCGACCGGXXXXXXXXXXXXXXXXXXXXXXXXXXXXXXXXXXXXXXXXXXXXXXXXXXXXXXXXXXXXXXXXXXXXXXXXXXXX  
600 610 620 630 640 650 660 670 680 690 700 710 720 730 740 750 760 770 780 790

AGGGCAAGAAATAGAGTAGATGCCGACCGG-ATCTGTGCGATGCACAAGCTTCGAGTTTCTCCATAAATATGTTGAGTAGTTCOCAGATAAGGGAATTAGGGTTCCATATAGGGTTTTGCGCTCATGTGTTGAGCATATAAGAACCCTTAGTAGTGTAATTTGTAATTTGTAAAATACTTCTATCAATAAAAAATTTCTAN  
AGGGCAAGAAATAGAGTAGATGCCGACCGG-ATCTGTGCGATGCACAAGCTTCGAGTTTCTCCATAAATATGTTGAGTAGTTCOCAGATAAGGGAATTAGGGTTCCATATAGGGTTTTGCGCTCATGTGTTGAGCATATAAGAACCCTTAGTAGTGTAATTTGTAATTTGTAAAATACTTCTATCAATAAAAAATTTCTAN

AGGGCAATAGGTCAT--CAGTGGCTAGGCGG

AGGGCAAAGAAATAGAGTAGATGCCGACCGGGATCTGTGCATCGACAAGCTCGAGTTTCTCCATAATAATGTGTGAGTAGTTCCAGATAAAGGGAATTAGGGTTCTCTATAGGGTTTCGCTCATGTGTTGAGCATATAAGAAACCCCTTAGTATGTATTTGTATTTGAAAAACTTCTATCAATAAAATTTCTAA/

semi-oSSP II site
